# Supplementary material for: SalMotifDB: a tool for analyzing putative transcription factor binding sites in salmonid genomes
Source: BMC Genomics. 2019 Sep 2;20:694. doi: 10.1186/s12864-019-6051-0 (PMC6720087; doi:10.1186/s12864-019-6051-0)
Supplement: Supplementary file 5 — Table S1. Motifs in SalMotifDB that were significantly enriched (p < 0.05) in the promoters of genes in gene set 1: genes that are differently regulated between Atlantic salmon that were given feed with contrasting lipid and fatty acid content in fresh water. (XLSX 35 kb) [file 12864_2019_6051_MOESM5_ESM.xlsx]

## Sheet: Sheet1
Motif.ID	TF	Motif.database	P.value
5977	NF-YA	TRANSFAC	2.39052e-13
525	DUX	CISBP	7.46489e-09
5754	NF-Y	TRANSFAC	1.59764e-08
10251	NF-Y	TRANSFAC	7.93039e-08
10465	DMRT1	TRANSFAC	1.10677e-07
643	NK-LIKE_21	CISBP	2.00421e-07
9064	CPHX	UniPROBE	7.88007e-07
2678	FORKHEAD_BOX_PROTEIN_O1	3D-footprint	2.22193e-06
365	BGIBMGA013198	CISBP	3.64325e-06
601	CG15696	CISBP	3.778e-06
396	DMD-4	CISBP	4.81702e-06
111	XRP1	CISBP	6.16363e-06
3537	CREB1	HT-SELEX2	9.8757e-06
5873	PEBP2BETA	TRANSFAC	1.76386e-05
1779	HOXB2_PITX1	HumanTF2	2.18841e-05
6701	ZFP768	TRANSFAC	2.31934e-05
9083	MEIS1B:HOXA9	TRANSFAC	2.32264e-05
3861	FOXJ2	HT-SELEX2	2.36195e-05
1325	UNC-62	JASPAR	2.58736e-05
10875	HOXD13	JASPAR	5.03197e-05
3998	HOXA10	HT-SELEX2	5.74003e-05
1054	FBGN0262477	CISBP	7.11251e-05
1905	RFX3_BHLHA15	HumanTF2	7.59717e-05
256	ZSCAN4	CISBP	9.08556e-05
9301	BR-Z2	DrosophilaTF	0.00011119
9328	PRD-HD	DrosophilaTF	0.000123085
199	FOSL2	CISBP	0.000126492
11121	PBX-1	TRANSFAC	0.00012895
9922	POU3F1	HumanTF	0.000136225
9739	ZEN	TRANSFAC	0.000143445
1047	CG12768	CISBP	0.000148364
789	SMP_016180	CISBP	0.000149426
5682	SREBF1	HUMAN.H10MO.B	0.000172192
3094	GFI1_N382S_R1	UniPROBE	0.000174064
1217	PROTEIN_(LYMPHOID_ENHANCER-BINDING_FACTOR)	3D-footprint	0.000184862
9490	TEF	TRANSFAC	0.000188443
8799	XFD-1	TRANSFAC	0.000191664
10540	SPI1_(PU1)	TRANSFAC	0.000205525
614	CBG24578	CISBP	0.000223711
7067	ZNF91	TRANSFAC	0.000228164
10089	SREBP-1	TRANSFAC	0.000243609
1768	HOXB2_NHLH1	HumanTF2	0.000264222
10459	EVI-1	TRANSFAC	0.000315236
6720	ZNF454	TRANSFAC	0.000330004
325	K02D7.2	CISBP	0.00033124
10707	TTK_69K	TRANSFAC	0.000339088
1865	PBX4_HOXA1	HumanTF2	0.000396195
4384	MSC	HT-SELEX2	0.000415624
9423	CUX2	HumanTF	0.000418854
9150	HLH-14	UniPROBE	0.000439074
851	HMG20B	CISBP	0.000452491
4870	SCRT2	HT-SELEX2	0.000484386
3160	NKX2-5_R190C_R1	UniPROBE	0.000544257
10250	SN	TRANSFAC	0.00055518
10499	IK-1	TRANSFAC	0.000576946
271	MTF1	CISBP	0.000581809
4674	GM397	TRANSFAC	0.000622591
5337	CDX4	MOUSE.H10MO.A	0.000666253
3168	NR2E3_R76Q_R1	UniPROBE	0.000671421
7794	VAX-1	TRANSFAC	0.000695058
5430	FOXJ2	HUMAN.H10MO.C	0.000708205
5617	POU5F1	MOUSE.H10MO.A	0.000724202
3221	PITX2_R108H_R2	UniPROBE	0.000760557
266	SP4	CISBP	0.000785181
4731	POU3F2	HT-SELEX2	0.000792163
3715	ELK4	HT-SELEX2	0.000819882
9104	FOXJ2	TRANSFAC	0.000870042
89	ARID3A	CISBP	0.000883686
8477	ETSLIKE	TRANSFAC	0.00090143
10652	IPF1	TRANSFAC	0.000945769
7026	ZNF445	TRANSFAC	0.00095269
3879	FOXP3	HT-SELEX2	0.000974254
8419	TLL	TRANSFAC	0.000990708
4347	MAX	HT-SELEX2	0.000996709
1231	CF2-II	TRANSFAC	0.00099771
7098	ZNF415	TRANSFAC	0.00106017
4883	SIX2	HT-SELEX2	0.00106145
7791	MOP7	TRANSFAC	0.00107568
6542	ZNF133	TRANSFAC	0.001124
6470	ZNF73	TRANSFAC	0.00112749
5630	PTF1A	HUMAN.H10MO.C	0.00113003
10987	CG11071	FlyZincFinger	0.00118112
6947	ZNF14	TRANSFAC	0.00119437
6555	ZNF30	TRANSFAC	0.00123463
3798	FERD3L	HT-SELEX2	0.00123699
8819	FREAC-7	TRANSFAC	0.00125065
8457	TBX2	TRANSFAC	0.00125997
7352	ZFP90	TRANSFAC	0.00126639
7253	ZNF677	TRANSFAC	0.00130009
10590	ZEB1	JASPAR	0.00132419
7157	ZNF79	TRANSFAC	0.00132585
1151	KNRL	CISBP	0.00141425
10252	SREBP	TRANSFAC	0.00141677
6549	TCF17	TRANSFAC	0.00142598
10778	TCFAP2A_2	JASPAR	0.00144086
5173	SRY	TRANSFAC	0.00153066
3153	MSX2_R172H_R2	UniPROBE	0.00158958
10932	BR-C_Z4	TRANSFAC	0.00163093
1736	HOXB13_EOMES	HumanTF2	0.00164826
545	BX908797.1	CISBP	0.00166679
2654	TRANS-ACTING_T-CELL-SPECIFIC_TRANSCRIPTION_FACTOR_	3D-footprint	0.00167051
10345	FOXP3	TRANSFAC	0.00168684
8931	FOXA2	UniPROBE	0.00172296
2559	POU_DOMAIN,_CLASS_5,_TRANSCRIPTION_FACTOR_1	3D-footprint	0.00174106
1953	TEAD4_EOMES	HumanTF2	0.00174617
7091	ZNF763	TRANSFAC	0.00180119
1764	HOXB2_HOXB13	HumanTF2	0.00183928
4486	NKX2-3	HT-SELEX2	0.0019269
5481	HOXA10	HUMAN.H10MO.C	0.00193286
9166	HLH-2	UniPROBE	0.00194818
2440	HOMEOBOX_PROTEIN_HOX-A13	3D-footprint	0.0019738
10113	SPIC	HumanTF	0.00199134
862	SOX18	CISBP	0.00201057
6671	ZFP2	TRANSFAC	0.00206787
10241	C/EBP	TRANSFAC	0.00207242
11016	TEF	TRANSFAC	0.00218025
10070	SOX9	HumanTF	0.00220919
10300	ZESTE	TRANSFAC	0.00227263
10401	CBF_(CORE_BINDING_FACTOR)	TRANSFAC	0.00231971
1949	TEAD4_ELK1	HumanTF2	0.0023265
5245	ZNF580	HT-SELEX2	0.00233639
8602	GR	TRANSFAC	0.00238832
92	ARID5A	CISBP	0.00242441
8244	EY	TRANSFAC	0.00244192
5837	YB-1	TRANSFAC	0.00245618
908	CROC	CISBP	0.00246781
767	NHR-49	CISBP	0.0024838
1547	ETV2_TEF	HumanTF2	0.00251855
11009	CG5669	FlyZincFinger	0.00252445
6536	ZNF200	TRANSFAC	0.0025569
8809	RFX1	TRANSFAC	0.00265377
558	HOXB13	CISBP	0.00272075
3196	PAX6_P118R_R1	UniPROBE	0.00272574
1672	GCM1_FOXO1	HumanTF2	0.00274241
6049	SIN3A	TRANSFAC	0.00275855
7586	ZNF304	TRANSFAC	0.00284352
5948	TEF-5	TRANSFAC	0.00288713
10537	GFI1	JASPAR	0.00289631
1771	HOXB2_PAX1	HumanTF2	0.00290892
5403	MECOM	HUMAN.H10MO.B	0.00293745
1989	TEAD4_HOXA3	HumanTF2	0.00294293
5899	FRA-2	TRANSFAC	0.00296152
3108	HOXB7_K191R_R2	UniPROBE	0.00296944
6498	ZNF879	TRANSFAC	0.00299745
3087	FOXC1_L130F_R1	UniPROBE	0.00301337
7769	SMAD8	TRANSFAC	0.00301572
8003	ELF-1	TRANSFAC	0.00302055
8127	CNC	TRANSFAC	0.00305701
7620	ZNF214	TRANSFAC	0.00310389
531	CEH-34	CISBP	0.00311433
778	NHR-145	CISBP	0.00314208
6050	C-FOS	TRANSFAC	0.003262
9563	FOXJ3	HumanTF	0.00326579
4350	MEF2B	HT-SELEX2	0.00336109
1775	HOXB2_PAX9	HumanTF2	0.0034275
3161	NKX2-5_T178M_R1	UniPROBE	0.00345879
7446	ZNF566	TRANSFAC	0.00346537
6423	ZNF498	TRANSFAC	0.00351259
7881	HOXA10	TRANSFAC	0.00360079
1968	TEAD4_FIGLA	HumanTF2	0.00366564
3162	NKX2-8_REF_R1	UniPROBE	0.0036979
6872	ZIPRO1	TRANSFAC	0.00369857
2187	PROTEIN_PIT-1	3D-footprint	0.00373359
10776	BR-C_Z1	TRANSFAC	0.00374426
10683	NR1H3::RXRA	JASPAR	0.00377055
6473	ZSCAN5C	TRANSFAC	0.0038691
10593	TP53	JASPAR	0.00389989
10270	E2A	TRANSFAC	0.00391593
7659	ZNF592	TRANSFAC	0.0039411
6374	ZNF280B	TRANSFAC	0.0039566
1514	ETV2_HES7	HumanTF2	0.00398597
3111	HOXB7_M190L_R2	UniPROBE	0.00408668
1460	ERF_FIGLA	HumanTF2	0.00414037
10731	MTF1	TRANSFAC	0.00418187
2877	SOX8	UniPROBE	0.00432776
6252	ZID	TRANSFAC	0.00438817
10417	TCF	TRANSFAC	0.00444436
1604	FOS	HumanTF2	0.00456434
1876	PITX1_TBX21	HumanTF2	0.00462815
1055	CG17181	CISBP	0.00464543
1579	ETV7	HumanTF2	0.00473366
11134	OTP	TRANSFAC	0.00474188
7562	ZFP	TRANSFAC	0.00483505
1464	ERF_FOXO1	HumanTF2	0.00485463
240	CES-2	CISBP	0.00487056
4332	MAFG	HT-SELEX2	0.00489463
2153	GFI1	TRANSFAC	0.00492901
1378	CUX1_FOXO1	HumanTF2	0.00499771
8470	DLX2	TRANSFAC	0.00500241
6592	ZNF470	TRANSFAC	0.00502437
10745	NANOG	TRANSFAC	0.00508922
7398	APAK	TRANSFAC	0.0051487
11021	CG11924	FlyZincFinger	0.00516725
6457	REX-1	TRANSFAC	0.00521784
101	ENSDARG00000078124	CISBP	0.00528148
10120	TBX1	HumanTF	0.00530151
2907	ISGF3G	UniPROBE	0.00541914
1716	GCM2_ONECUT2	HumanTF2	0.00542852
10280	MYB	TRANSFAC	0.00548435
3140	KLF1_REF_R1	UniPROBE	0.0057076
10329	RFX	TRANSFAC	0.00578369
6912	ZNF729	TRANSFAC	0.00578742
7742	ZNF611	TRANSFAC	0.00580868
10073	SOX9	HumanTF	0.00583828
8218	BSH	TRANSFAC	0.00583986
10737	ELT-3	JASPAR	0.00586415
2105	SMAD4	TRANSFAC	0.00587341
5574	NKX3-1	HUMAN.H10MO.C	0.00589446
11168	NKX2-4	TRANSFAC	0.00589814
398	C34D1.1	CISBP	0.00601537
4494	NKX2-8	HT-SELEX2	0.00603694
1030	FPM315_(ZNF263)	TRANSFAC	0.00604806
6206	LBX1	TRANSFAC	0.00608879
3130	HOXD13_R306W_R1	UniPROBE	0.00610191
8804	P53	TRANSFAC	0.00610397
2691	PITX2	TRANSFAC	0.00613681
4516	NR1D2	HT-SELEX2	0.00616218
5604	PBX1	HUMAN.H10MO.B	0.00618433
6938	ZNF325	TRANSFAC	0.00621085
10051	SOX2	HumanTF	0.00624593
9901	PAX9	HumanTF	0.00628834
8984	AREB6	TRANSFAC	0.00640241
2309	NUCLEAR_FACTOR_NF-KAPPA-B_P65_SUBUNIT	3D-footprint	0.00643034
5825	GABPALPHA_GABPBETA	TRANSFAC	0.00653943
7822	PRDM12	TRANSFAC	0.00670025
2463	HOMEOTIC_PROTEIN_SEX_COMBS_REDUCED	3D-footprint	0.00680401
163	SIX-2	TRANSFAC	0.00682064
8613	MAZ	TRANSFAC	0.00682842
10343	FOXP1	TRANSFAC	0.00684182
3567	INV	TRANSFAC	0.00702314
2264	CCAAT/ENHANCER_BINDING_PROTEIN_BETA	3D-footprint	0.00702882
671	POU1F1	CISBP	0.00707132
7015	ZNF85	TRANSFAC	0.00713004
5141	ZBTB20	HT-SELEX2	0.00717677
8418	TLL	TRANSFAC	0.00720691
5556	NFE2L1	HUMAN.H10MO.C	0.00721147
3940	GRHL1	HT-SELEX2	0.0072438
6476	ZNF73	TRANSFAC	0.00736112
8424	CG14860	TRANSFAC	0.00736937
407	DMRT2	CISBP	0.00737308
5236	ZNF501	HT-SELEX2	0.00743279
1902	POU2F1_TBX21	HumanTF2	0.00754242
6294	TCF-4	TRANSFAC	0.00755695
9815	CACCC-BINDING_FACTOR	TRANSFAC	0.00757289
7318	ZNF440	TRANSFAC	0.00772353
2496	POU_DOMAIN,_CLASS_6,_TRANSCRIPTION_FACTOR_1	3D-footprint	0.00779339
10697	NRF1	JASPAR	0.00781081
10809	DBX1	JASPAR	0.00782549
3207	PBX4_REF_R2	UniPROBE	0.00786035
9828	NFATC1	HumanTF	0.00790554
9275	AFP1	TRANSFAC	0.00794991
8201	ABD-A	TRANSFAC	0.00799824
7133	ZNF829	TRANSFAC	0.00800159
1370	CLOCK_EVX1	HumanTF2	0.00812637
7914	NF-1C	TRANSFAC	0.00812781
5186	ZNF174	HT-SELEX2	0.00837434
8882	OSR1	UniPROBE	0.00842802
6945	ZNF14	TRANSFAC	0.00862282
7006	ZNF83	TRANSFAC	0.00866734
5149	ZBTB32	HT-SELEX2	0.00867076
7712	ZNF671	TRANSFAC	0.00873927
1077	CG8281	CISBP	0.00879205
6171	SOX-11	TRANSFAC	0.00898953
5892	USF2	TRANSFAC	0.00903546
6449	STAF	TRANSFAC	0.00915543
8165	FD102C	TRANSFAC	0.00917024
1042	CG11504	CISBP	0.0092107
3114	HOXC4_REF_R1	UniPROBE	0.00922047
6331	ZBTB41	TRANSFAC	0.00922102
949	GFI1	CISBP	0.00923861
7988	MECP-2	TRANSFAC	0.00927958
6949	ZNF17	TRANSFAC	0.00927964
10755	EHF	JASPAR	0.00928043
10551	MAX	JASPAR	0.0093666
7358	ZFP90	TRANSFAC	0.00937619
7210	ZNF841	TRANSFAC	0.00953043
3883	FOXR2	HT-SELEX2	0.00954923
8447	HOXD10	TRANSFAC	0.00965382
10033	HFH4_(FOXJ1)	TRANSFAC	0.00980076
7128	ZNF678	TRANSFAC	0.00981621
5246	ZNF580	HT-SELEX2	0.00982888
4626	PAX3	HT-SELEX2	0.00990916
10720	MTF1	TRANSFAC	0.00992129
8496	TEF5	TRANSFAC	0.00997001
10267	PIT-1	TRANSFAC	0.0100329
7692	ZNF549	TRANSFAC	0.010051
7039	ZNF135	TRANSFAC	0.0100562
10404	BRCA1:USF2	TRANSFAC	0.0102317
711	TERF2	CISBP	0.0102779
10428	OVO	TRANSFAC	0.0103307
7075	ZSCAN2	TRANSFAC	0.0103861
7287	ZNF493	TRANSFAC	0.010419
10328	SMAD	TRANSFAC	0.0105068
160	OLIG3	CISBP	0.0105205
6497	ZNF879	TRANSFAC	0.0105918
1581	ETV7_TBX21	HumanTF2	0.0106426
1398	E2F1_ELK1	HumanTF2	0.0106758
5303	AIRE	HUMAN.H10MO.C	0.0106773
7918	RFX	TRANSFAC	0.0107126
3214	PHOX2B_R141G_R1	UniPROBE	0.010747
6059	ESET	TRANSFAC	0.0108627
2641	NF-E2	TRANSFAC	0.0109071
6144	HLH-2:HLH-4	TRANSFAC	0.0109544
288	SNAI1	CISBP	0.0110042
3923	GFI1	HT-SELEX2	0.0111873
7785	VBP	TRANSFAC	0.0112041
6487	ZNF286B	TRANSFAC	0.0112771
8012	SIX-3	TRANSFAC	0.0114036
8398	SOB	TRANSFAC	0.0114758
787	VDR	CISBP	0.0115781
3987	HMX2	HT-SELEX2	0.011649
2739	ARYL_HYDROCARBON_RECEPTOR_NUCLEAR_TRANSLOCATOR	3D-footprint	0.0116656
6272	ZFP784	TRANSFAC	0.0117288
4931	SOX8	HT-SELEX2	0.0117761
1697	GCM1_SPDEF	HumanTF2	0.011923
6283	RREB-1	TRANSFAC	0.0119811
10688	MEIS1	JASPAR	0.0120485
7286	ZNF647	TRANSFAC	0.0120684
7796	LUMAN	TRANSFAC	0.0121205
360	MEX-6	CISBP	0.0121334
5529	MEF2A	HUMAN.H10MO.A	0.0121334
4427	NANOG	HT-SELEX2	0.0121739
6172	FOXD2	TRANSFAC	0.0122072
8446	FOXL2	TRANSFAC	0.0124108
6261	ZFP445	TRANSFAC	0.0124631
6776	ZNF408	TRANSFAC	0.0127413
8370	DATI	TRANSFAC	0.0127658
5945	RREB-1	TRANSFAC	0.0128476
7250	ZNF497	TRANSFAC	0.0129048
6860	ZNF586	TRANSFAC	0.0130459
7326	ZNF433	TRANSFAC	0.0131486
719	NHR-154	CISBP	0.0132234
7474	ZNF587	TRANSFAC	0.0132568
9329	FXR/RXR-ALPHA	TRANSFAC	0.0132705
5487	HOXB8	HUMAN.H10MO.C	0.013298
5011	TEAD1	HT-SELEX2	0.0133074
10981	CG2932	FlyZincFinger	0.0135075
5554	NEUROD1	HUMAN.H10MO.C	0.0135521
6996	ZNF132	TRANSFAC	0.0136028
7782	MEOX2	TRANSFAC	0.0136908
10348	PBX	TRANSFAC	0.0138131
2590	TRANSCRIPTION_FACTOR_SOX-4	3D-footprint	0.0138616
3386	ZFP82	SMILE-seq	0.01388
6652	ZNF605	TRANSFAC	0.0139014
108	HMGA2	CISBP	0.0140086
7184	ZNF813	TRANSFAC	0.0140373
7717	ZNF224	TRANSFAC	0.0140684
4767	POU6F1	HT-SELEX2	0.0142248
7524	ZNF251	TRANSFAC	0.0142276
7715	ZNF224	TRANSFAC	0.014272
5856	GFI1B	TRANSFAC	0.0144547
8361	BTEB2	TRANSFAC	0.0144741
5732	SIX6	TRANSFAC	0.0145267
8434	POU2F1:FOXO6	TRANSFAC	0.0146124
1899	POU2F1_TBX21	HumanTF2	0.0146716
3179	PAX3_R270C_R1	UniPROBE	0.0148306
8741	POU5F1	JASPAR	0.0148371
7602	ZFP-37	TRANSFAC	0.0148802
1412	E2F3_ONECUT2	HumanTF2	0.0149287
9913	POU1F1	HumanTF	0.0150757
2826	TCFAP2A	UniPROBE	0.0151187
7970	SLUG	TRANSFAC	0.015175
7057	ZNF33A	TRANSFAC	0.0152178
10563	RORA(VAR.2)	JASPAR	0.0152851
1855	MYBL1_HOXA13	HumanTF2	0.0152917
7294	ZNF547	TRANSFAC	0.0153401
1079	CG8765	CISBP	0.0153518
837	GMEB2	CISBP	0.0154655
9269	PPAR	TRANSFAC	0.0155452
10130	TBX21	HumanTF	0.015574
10350	AIRE	TRANSFAC	0.0155758
7670	SALL2	TRANSFAC	0.0156274
6685	ZNF572	TRANSFAC	0.0156784
9162	LIN-32	UniPROBE	0.0157893
8363	CG10654	TRANSFAC	0.0159202
5120	YY1	HT-SELEX2	0.0161128
10135	TBX21	HumanTF	0.0162679
10780	IPF1	TRANSFAC	0.0163565
3264	VSX2_R200P_R1	UniPROBE	0.0164293
10612	GATA1::TAL1	JASPAR	0.0166972
7876	ELK-1	TRANSFAC	0.0167066
321	F52B5.7	CISBP	0.0167167
1381	CUX1_HOXA13	HumanTF2	0.0167314
1612	FOXJ2_HOXB13	HumanTF2	0.0170134
1948	TEAD4_ELK1	HumanTF2	0.0170411
8884	TBP	UniPROBE	0.0172398
5459	GLI2	HUMAN.H10MO.B	0.0174207
8352	SD	TRANSFAC	0.0174528
10103	SOX17	HumanTF	0.0175571
7025	ZNF81	TRANSFAC	0.0176228
5830	MSX-2	TRANSFAC	0.0177866
1942	AML2	TRANSFAC	0.0178043
824	CPRT0000009601	CISBP	0.0179372
10416	PRD	TRANSFAC	0.0180625
1804	HOXD12_EOMES	HumanTF2	0.0180915
2929	MTF1	UniPROBE	0.0182031
2000	TEAD4_PAX5	HumanTF2	0.0182923
9296	BAB1	DrosophilaTF	0.0183008
8018	TRPS1	TRANSFAC	0.0183437
2382	HNF-3/FORK_HEAD_DNA-RECOGNITION_MOTIF	3D-footprint	0.0184923
4925	SOX3	HT-SELEX2	0.0184947
7277	ZNF788	TRANSFAC	0.018707
3613	DLX5	HT-SELEX2	0.0190236
1523	ETV2_ONECUT2	HumanTF2	0.0190518
6037	JUND	TRANSFAC	0.0190822
2819	ANTENNAPEDIA_HOMEODOMAIN	3D-footprint	0.0190865
5325	ZFP187	TRANSFAC	0.0192181
5870	2003-10-01	TRANSFAC	0.019313
124	HLH-16	CISBP	0.0193515
3227	POU3F4_A312V_R1	UniPROBE	0.0194124
7775	DUX1	TRANSFAC	0.0194586
4752	POU4F3	HT-SELEX2	0.01955
8733	KLF9	JASPAR	0.0196552
5154	ZBTB45	HT-SELEX2	0.019657
10004	RARA	HumanTF	0.019673
3334	LEF1	SMILE-seq	0.0199172
7221	ZFP629	TRANSFAC	0.0199692
6565	ZNF37A	TRANSFAC	0.0201306
1447	ELK1_TBX21	HumanTF2	0.0202482
417	T22H9.4	CISBP	0.0204602
6398	ZBTB34	TRANSFAC	0.020603
9280	ABD-B	DrosophilaTF	0.0206862
5780	COUP-TF2	TRANSFAC	0.0207763
10082	SPDEF	HumanTF	0.0208026
3061	ARX_P353R_R2	UniPROBE	0.0208298
416	DMRT99B	CISBP	0.0211686
7777	SMAD8	TRANSFAC	0.0211725
7380	ZNF555	TRANSFAC	0.0214212
7293	ZNF525	TRANSFAC	0.0215434
9349	HOXA4	TRANSFAC	0.021667
6344	BLIMP-1	TRANSFAC	0.0217227
5726	THRB	HUMAN.H10MO.C	0.0218099
6775	ZNF700	TRANSFAC	0.0219017
2200	PROTEIN_(TATA_BINDING_PROTEIN_(TBP))	3D-footprint	0.022056
6815	ZFP14	TRANSFAC	0.022417
3902	GATA5	HT-SELEX2	0.022517
4834	RFX5	HT-SELEX2	0.0227789
10545	IRF1	JASPAR	0.0228526
7627	ZNF780B	TRANSFAC	0.023049
4334	MAFG	HT-SELEX2	0.0231738
6878	ZNF729	TRANSFAC	0.0231857
8964	HMX1	UniPROBE	0.0234291
5805	SNA	TRANSFAC	0.023447
1329	CES-2	JASPAR	0.0237035
8563	NKX2-5	TRANSFAC	0.0237337
6460	GATA-6	TRANSFAC	0.0237346
9397	BARHL1	HumanTF	0.0237626
7179	ZNF343	TRANSFAC	0.0238947
6939	ZNF21	TRANSFAC	0.0247593
6524	ZNF154	TRANSFAC	0.0249858
5077	TLX3	HT-SELEX2	0.0249931
7661	ZFP382	TRANSFAC	0.0250137
6709	ZNF625	TRANSFAC	0.025165
7203	ZFP629	TRANSFAC	0.025194
1442	ELK1_SREBF2	HumanTF2	0.0254819
1046	CG12605	CISBP	0.0255915
8427	ABL1	TRANSFAC	0.0257264
3028	CLAMP_CTERM4ZN	UniPROBE	0.0260461
2897	EOMES	UniPROBE	0.0260781
10227	ZNF232	HumanTF	0.0262867
9346	GCM	TRANSFAC	0.0263759
2855	ZBTB3	UniPROBE	0.0266
8476	ERG	TRANSFAC	0.0266254
2906	FOXA2	UniPROBE	0.0267014
1170	PEB	CISBP	0.0269111
7145	ZNF181	TRANSFAC	0.0269436
1229	HBP1	TRANSFAC	0.0269436
6696	ZNF690	TRANSFAC	0.0270252
7012	ZFP39	TRANSFAC	0.0271495
8135	KAY	TRANSFAC	0.0271941
326	K11D2.4	CISBP	0.0271986
5930	CDP	TRANSFAC	0.0274338
6013	BLIMP-1	TRANSFAC	0.0279934
6221	BRN-3B	TRANSFAC	0.0283299
1240	TST-1	TRANSFAC	0.0283708
45	DUXL	TRANSFAC	0.0284222
5212	ZNF345	HT-SELEX2	0.0286275
2909	SRF	UniPROBE	0.0288066
1191	SQZ	CISBP	0.0288565
9833	NFIX	HumanTF	0.0290895
8158	FOXP	TRANSFAC	0.0291
3124	DR	TRANSFAC	0.0291612
6157	ZNF652	TRANSFAC	0.029166
7002	ZNF135	TRANSFAC	0.0293689
7127	ZFP206	TRANSFAC	0.0294822
6663	ZFP184	TRANSFAC	0.0295528
1715	GCM2_MAX	HumanTF2	0.0296699
6116	SP2	TRANSFAC	0.0298551
7403	ZNF418	TRANSFAC	0.0300384
10651	BHLHE40	JASPAR	0.0302725
6765	ZBTB20	TRANSFAC	0.0302795
11032	CG4807	FlyZincFinger	0.0303563
11066	CG5575	FlyZincFinger	0.0306489
7758	ZNF652	TRANSFAC	0.0307812
1776	HOXB2_PITX1	HumanTF2	0.0309219
5703	RBPJ	HUMAN.H10MO.C	0.0310502
3819	FOSL1	HT-SELEX2	0.0310903
8162	CHECKPOINT_SUPPRESSOR_HOMOLOGUE	TRANSFAC	0.0311458
109	PHF21A	CISBP	0.031211
246	MNM-2	CISBP	0.0314776
7188	ZFP329	TRANSFAC	0.031867
11022	CG11924	FlyZincFinger	0.0320056
5297	ZSCAN31	HT-SELEX2	0.0322276
3233	POU4F3_N316K_R1	UniPROBE	0.0323059
2675	RUNT-RELATED_TRANSCRIPTION_FACTOR_1	3D-footprint	0.0324222
8782	UNKNOWNFH	EEADannot	0.0325094
1856	MYBL1_MAX	HumanTF2	0.032515
2965	GST-NOTCH1_FIG4	UniPROBE	0.0326133
1531	ETV2_RFX5	HumanTF2	0.0327367
5119	XPA	HT-SELEX2	0.0327812
4266	LBX2	HT-SELEX2	0.0329797
6395	ZNF777	TRANSFAC	0.0329913
7638	ZFP507	TRANSFAC	0.0332168
4763	POU6F1	HT-SELEX2	0.0334344
5026	TFAP2E	HT-SELEX2	0.0334556
2317	PAIRED_BOX_PROTEIN_PAX-5	3D-footprint	0.0335892
5295	ZBTB3	TRANSFAC	0.0337535
6820	ZNF860	TRANSFAC	0.0338186
10758	E2F-1	TRANSFAC	0.033821
1126	GL	CISBP	0.0338343
7306	ZNF557	TRANSFAC	0.0338802
1644	GCM1_ELK1	HumanTF2	0.0339744
6319	TBX20	TRANSFAC	0.0340191
11008	CG4854	FlyZincFinger	0.0340743
3642	DUXA	HT-SELEX2	0.0341278
1090	D19A	CISBP	0.0341303
9181	SPDEF	UniPROBE	0.0341656
8056	MEF-2	TRANSFAC	0.0341729
7591	ZNF225	TRANSFAC	0.0343314
7043	ZNF81	TRANSFAC	0.0344993
4696	HBP1	TRANSFAC	0.0345253
7279	ZNF571	TRANSFAC	0.0345591
6595	ZNF718	TRANSFAC	0.0347078
7793	B-ATF	TRANSFAC	0.0349826
6818	ZFP30	TRANSFAC	0.0350089
8414	DHR96	TRANSFAC	0.0351315
7268	ZNF836	TRANSFAC	0.0352651
3238	PROP1_REF_R1	UniPROBE	0.0353748
2069	BRN-2	TRANSFAC	0.035395
8643	RBPJK	TRANSFAC	0.0354968
2871	MAFB	UniPROBE	0.035554
10618	TCFCP2L1	JASPAR	0.0357058
1649	GCM1_ERG	HumanTF2	0.0357206
2591	ZINC_FINGER_PROTEIN_217	3D-footprint	0.0357219
7502	ZNF665	TRANSFAC	0.0359067
3629	DMRTC2	HT-SELEX2	0.0359229
5282	ZNF821	HT-SELEX2	0.0359833
798	LCOR	CISBP	0.036
11058	CG9786	FlyZincFinger	0.0360714
6338	ZNF580	TRANSFAC	0.0363769
5121	YY1	HT-SELEX2	0.0365658
7495	ZNF607	TRANSFAC	0.036648
7173	ZNF343	TRANSFAC	0.0367775
3247	SIX6_T165A_R2	UniPROBE	0.0369286
1778	HOXB2_PITX1	HumanTF2	0.0372833
7426	ZNF560	TRANSFAC	0.0373143
9340	GATA-4	TRANSFAC	0.037388
10518	DDIT3::CEBPA	JASPAR	0.0377957
2447	TRANSCRIPTION_FACTOR_P65/INTERFERON_REGULATORY_FAC	3D-footprint	0.0379774
6564	ZFX	TRANSFAC	0.0379783
8072	PSF	TRANSFAC	0.0383241
1829	MEIS1_EOMES	HumanTF2	0.0384451
2082	BTEB3	TRANSFAC	0.0385234
6237	ZKSCAN1	TRANSFAC	0.0385462
8827	PAX-9	TRANSFAC	0.0386943
7005	ZNF157	TRANSFAC	0.0388445
10124	TBX1	HumanTF	0.0389453
2926	KLF7	UniPROBE	0.0390119
2620	ESTROGEN_RECEPTOR	3D-footprint	0.03912
6292	ZNF342	TRANSFAC	0.0391521
6184	KLF8	TRANSFAC	0.0393319
5684	SRF	HUMAN.H10MO.A	0.0393486
630	PEML	CISBP	0.0393643
7324	HZF12	TRANSFAC	0.0395264
4556	NR4A1	HT-SELEX2	0.0396072
3129	HOXD13_Q325R_R2	UniPROBE	0.0397796
5596	OVOL1	HUMAN.H10MO.C	0.0398234
6910	ZNF623	TRANSFAC	0.0398463
7219	ZNF322A	TRANSFAC	0.0400916
6998	ZNF84	TRANSFAC	0.040116
8849	PAX-4	TRANSFAC	0.0404565
8048	TEF1	TRANSFAC	0.0404785
7130	ZNF124	TRANSFAC	0.040713
3936	GMEB1	HT-SELEX2	0.0407849
2402	FORKHEAD_BOX_PROTEIN_K2	3D-footprint	0.0409381
5941	ZFP105	TRANSFAC	0.0412101
303	ZFP128	CISBP	0.0412162
7215	ZFP1	TRANSFAC	0.041376
1145	HR83	CISBP	0.0421407
6166	CPBP	TRANSFAC	0.0422054
3961	HES5	HT-SELEX2	0.0422978
6821	ZNF701	TRANSFAC	0.04243
2629	PROTEIN_C-ETS-2	3D-footprint	0.0426486
6997	ZNF81	TRANSFAC	0.0427132
3944	MAB-3	TRANSFAC	0.0429826
1873	PITX1_HES7	HumanTF2	0.0430261
8129	CREBA	TRANSFAC	0.0430691
1422	ELK1_ETV7	HumanTF2	0.0433133
5152	ZBTB37	HT-SELEX2	0.0433475
7523	ZFP287	TRANSFAC	0.0434454
1767	HOXB2_NHLH1	HumanTF2	0.0435432
7596	ZN337	TRANSFAC	0.0437592
7288	ZSCAN30	TRANSFAC	0.043868
3465	BARHL2	HT-SELEX2	0.0439434
7313	ZNF808	TRANSFAC	0.044134
4764	POU6F1	HT-SELEX2	0.044168
2342	EARLY_GROWTH_RESPONSE_PROTEIN_1	3D-footprint	0.0443031
7337	ZFP770	TRANSFAC	0.0444192
6796	ZNF582	TRANSFAC	0.0445312
10354	HELIOS_A	TRANSFAC	0.0449812
770	NHR-1	CISBP	0.045105
11082	CG10309	FlyZincFinger	0.0451363
1718	GCM2_PITX1	HumanTF2	0.045327
9383	BARX1	HumanTF	0.0454106
4198	IRX3	HT-SELEX2	0.0455543
6240	ZNF574	TRANSFAC	0.0456073
2118	PBX	TRANSFAC	0.0457378
10526	EN1	JASPAR	0.0457425
172	HLH-29	CISBP	0.0458759
7456	ZNF764	TRANSFAC	0.046068
6039	TR4	TRANSFAC	0.0464761
277	ZBTB1	CISBP	0.0464913
5128	ZBTB12	HT-SELEX2	0.0473081
7942	POU3F2	TRANSFAC	0.0476214
1169	PAD	CISBP	0.0478262
8223	CG11085	TRANSFAC	0.0482181
1786	HOXB2_SOX15	HumanTF2	0.0482528
336	EGL-43	CISBP	0.048282
7553	ZNF355P	TRANSFAC	0.0483625
7480	ZSCAN5	TRANSFAC	0.0484296
8103	NAU	TRANSFAC	0.0484701
6471	ZNF500	TRANSFAC	0.0485961
4980	TBX20	HT-SELEX2	0.048692
7291	ZNF557	TRANSFAC	0.0487573
7560	ZNF331	TRANSFAC	0.0491566
1877	POU2F1_DLX2	HumanTF2	0.0491735
3295	FOXP2	SMILE-seq	0.0491896
7783	PBX3	TRANSFAC	0.0493997
6501	ZNF879	TRANSFAC	0.049593
1538	ETV2_SOX15	HumanTF2	0.0497374
